# Supplementary material for: Apuntes a la clasificación de los contratos en típicos, atípicos y mixtos
Source: Royal Society of Chemistry journal article supplement (doi:10.1039/c6cp01847e), 2008-01-01
Supplement: c6cp01847e1.pdf [file c6cp01847e1.pdf]

Supplementary information for

**Organically modified titania having a metal catalyst:**

**A new type of liquid-phase hydrogen-transfer photocatalyst working under visible  
light irradiation and H<sub>2</sub>-free conditions**

## Experimental

### Chemicals

All reagents were purchased from Wako Pure Chemical Industries, Ltd. and used without further purification.

### Preparation of 2,3-dihydroxynaphthalene-modified TiO<sub>2</sub> (TiO<sub>2</sub>-DHN)

Methanol solution (3 cm<sup>3</sup>) of 2,3-dihydroxynaphthalene (5 mg, corresponding to 1 wt%) was added to TiO<sub>2</sub> (495 mg) in an evaporating dish, and methanol was evaporated over a water bath at 313 K until dried powder was obtained.

### Preparation of Pd-loaded TiO<sub>2</sub>-DHN (Pd/TiO<sub>2</sub>-DHN)

Photodeposition was used for preparation of Pd/TiO<sub>2</sub>-DHN, i.e., for loading of a Pd catalyst (0.1 wt%) on TiO<sub>2</sub>-DHN. In an aqueous methanol solution (10 vol%, 10 cm<sup>3</sup>) containing palladium(II) chloride, TiO<sub>2</sub>-DHN particles were suspended, and the suspension was photoirradiated for 60 min with a 400 W high-pressure mercury arc ( $\lambda > 300$  nm, Eiko-sha, Osaka) with magnetic stirring under argon (Ar) at 298 K. Analysis of the liquid phase after photoirradiation revealed that Pd has been almost completely deposited on the TiO<sub>2</sub>-DHN particles. After photoirradiation, the Pd/TiO<sub>2</sub>-DHN was recovered, washed repeatedly with water by vigorous mixing, centrifuged (20 min at 3500 rpm) three times, and then dried at 293 K *in vacuo* for 60 min.

### Photocatalytic reaction

Thus-prepared Pd/TiO<sub>2</sub>-DHN (50 mg) was suspended in acetonitrile (5 cm<sup>3</sup>) containing alkene (50  $\mu$ mol) and a hole scavenger (triethanolamine, 80  $\mu$ mol) in a test tube. The tube was sealed with a rubber septum and then irradiated with visible light of

two sets of a blue LED (420-530 nm,  $137 \pm 4$  mW/cm<sup>2</sup>, Hayashi Watch Works, Tokyo) from two directions under Ar with magnetic stirring at 298 K. The emission spectrum of light from a blue LED is shown in Figure 1(a). After the reaction, the gas phase was analyzed by a gas chromatograph (Shimadzu, GC-8A equipped with an MS-5A column). After the suspension had been filtered to remove the particles, the amounts of products and starting compounds remaining were determined by a gas chromatograph (Shimadzu GC-2025 equipped with a DB-1 column).
